# Supplementary material for: κ- and λ-Carrageenans from Marine Alga Chondrus armatus Exhibit Anticancer In Vitro Activity in Human Gastrointestinal Cancers Models
Source: MDPI journal article supplement (doi:10.3390/md20120741), 2022-11-25
Supplement: s1 [file s1]

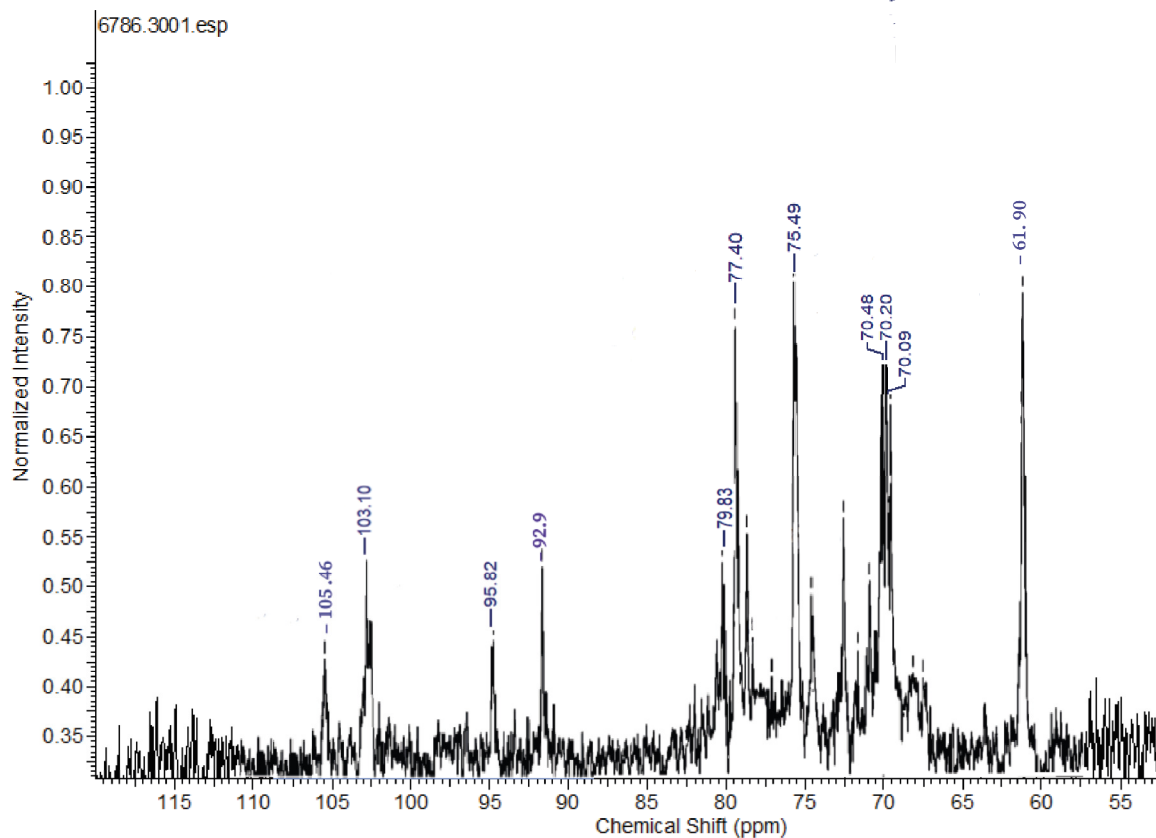

Supplementary Figure S1.  $^{13}\text{C}$  NMR spectrum of the fraction of isolated  $\kappa$ -carrageenan [Kalitnik, 2013 [29].

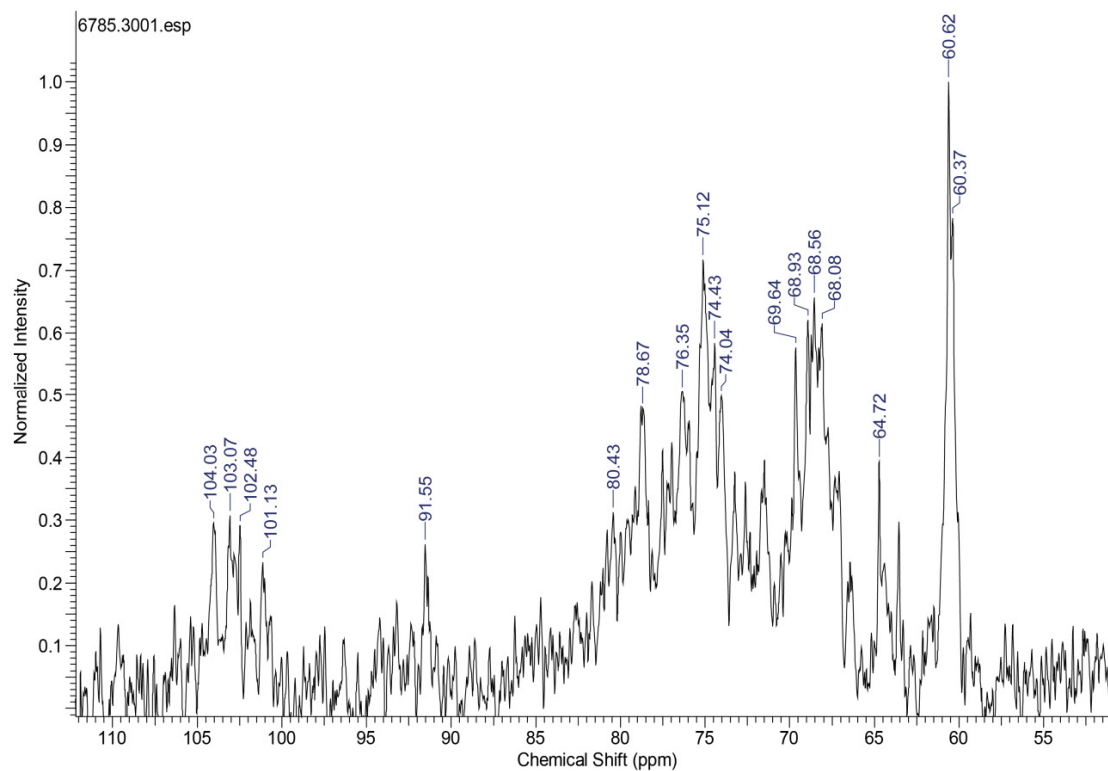

Supplementary Figure S2.  $^{13}\text{C}$  NMR spectrum of the fraction of isolated  $\lambda$ -carrageenan.

Supplementary Table S1. The IC<sub>50</sub> concentrations of  $\kappa$ - and  $\lambda$ - carrageenans.

| IC 50<br>$\mu$ g/ml | KYSE-30 | FLO-1 | HCT-116 | RKO   | RPE-1 |
|---------------------|---------|-------|---------|-------|-------|
| $\kappa$ -          | 394     | 405   | 347     | 350,6 | 728   |
| $\lambda$ -         | 352     | 184   | 206     | 248,3 | 615   |

Supplementary Table S2. Cell cycle analysis of KYSE-30, FLO-1, HCT-116, RKO and RPE-1 cells after  $\kappa$ -,  $\lambda$ - treatment. Average percentages, standard deviations ( $\pm$  SD), fold change in comparison the control and p values of 2-way Anova test with Sidak multiple comparisons (fold changes and p-values presented are calculated comparing the sample ( $\kappa$ -,  $\lambda$ -) to the untreated cells (0)).

| Exposure<br>time, hrs | Cells   | Phase | Sample      | % of cells in<br>cell cycle<br>phase | ( $\pm$ SD) | Fold<br>increase | p value |
|-----------------------|---------|-------|-------------|--------------------------------------|-------------|------------------|---------|
| 48                    | KYSE-30 | G2/M  | 0           | 6.7                                  | 1.03        | 3.3              | <0.005  |
|                       |         |       | $\kappa$ -  | 22.5                                 | 0.7         |                  |         |
|                       |         | G1/S  | 0           | 77.8                                 | 0.82        | 1.16             | <0.001  |
|                       |         |       | $\lambda$ - | 90.76                                | 1.01        |                  |         |
|                       | FLO-1   | S/G2  | 0           | 7.82                                 | 1.53        | 2.4              | <0.01   |
|                       |         |       | $\kappa$ -  | 19.3                                 | 0.62        |                  |         |
|                       |         |       | $\lambda$ - | 16.3                                 | 0.52        | 2.09             |         |
|                       | HCT-116 | S/G2  | 0           | 11.2                                 | 0.44        | 1.32             | <0.005  |
|                       |         |       | $\kappa$ -  | 14.9                                 | 0.51        |                  |         |
|                       | RKO     | G1/S  | 0           | 60.8                                 | 0.41        | 1.13             | <0.005  |
|                       |         |       | $\kappa$ -  | 69.2                                 | 0.36        |                  |         |
|                       | RPE-1   | G2/M  | 0           | 15.87                                | 1.34        | ns               | -       |
|                       |         |       | $\kappa$ -  | 16.82                                | 0.88        |                  |         |
|                       |         |       | $\lambda$ - | 16.87                                | 0.08        |                  |         |

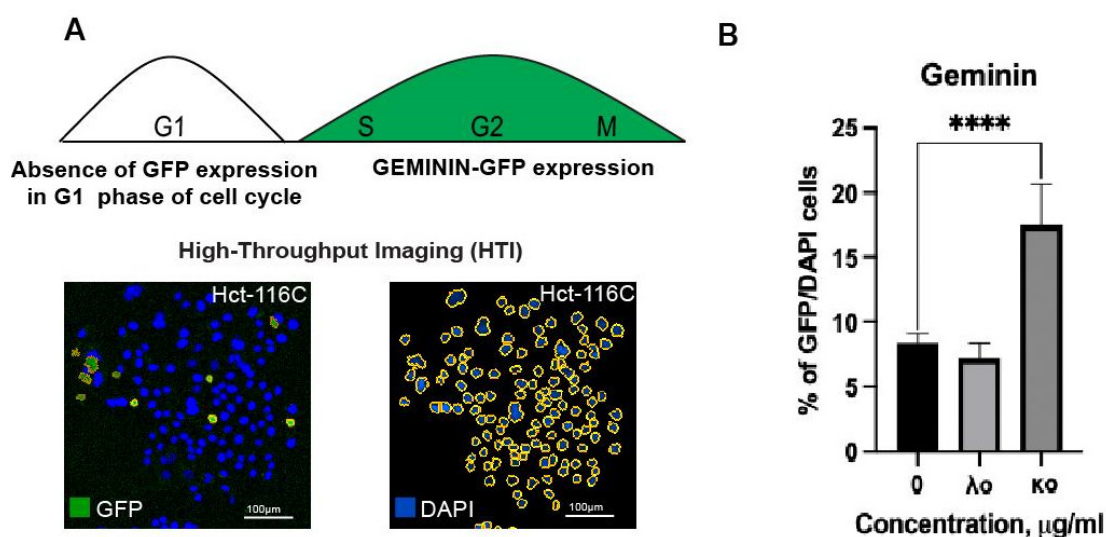

Supplementary Figure S3. Distribution of the cell cycle by GMNN\_GFP fusions expression. (a) HCT-116 cells express GFP-fusions: GMININ-GFP is expressed in the S-G-M phases of the cell cycle. (b) Accumulation GMININ-GFP-positive cells upon treatment with  $\kappa$ -carrageenan.

Supplementary Table S3. Apoptosis analysis of KYSE-30, FLO-1, HCT-116, RKO and RPE-1 cells after  $\kappa$ -,  $\lambda$ - treatment. Average percentages, standard deviations ( $\pm$  SD), fold change in comparison the control and p values of 2-way Anova test with Sidak multiple comparisons (fold changes and p-values presented are calculated comparing the sample ( $\kappa$ -,  $\lambda$ -) to the untreated cells (0)).

| Cells   | Stage           | Treatment    | % of cells in apoptotic stage | ( $\pm$ SD) | Fold increase | p value |
|---------|-----------------|--------------|-------------------------------|-------------|---------------|---------|
| KYSE-30 | Early apoptosis | 0            | 0.33                          | 0.11        | 19.5          | < 0,02  |
|         |                 | $\kappa$ o-  | 6.45                          | 1.11        |               |         |
|         |                 | $\lambda$ o- | 3.19                          | 2.17        | ns            | -       |
|         | Late apoptosis  | 0            | 0.22                          | 0.04        | 24.9          | <0,005  |
|         |                 | $\kappa$ o-  | 5.49                          | 0.47        |               |         |
|         |                 | $\lambda$ o- | 4.16                          | 0.91        | 18.9          | <0,02   |
| FLO-1   | Early apoptosis | 0            | 0.4                           | 0.52        | 45.8          | <0,005  |
|         |                 | $\kappa$ o-  | 18.33                         | 1.52        |               |         |
|         |                 | $\lambda$ o- | 3.94                          | 0.38        | 9.85          |         |
|         | Late apoptosis  | 0            | 0.54                          | 0.44        | 15.5          | <0,05   |
|         |                 | $\kappa$ o-  | 8.4                           | 0.36        |               |         |
|         |                 | $\lambda$ o- | 2.54                          | 0.46        | 4.7           |         |

|         |                 |     |       |       |       |        |
|---------|-----------------|-----|-------|-------|-------|--------|
| HCT-116 | Early apoptosis | 0   | 1.23  | 0.25  | 7.58  | <0,005 |
|         |                 | κo- | 9.33  | 0.57  |       |        |
|         |                 | λo- | 5.26  | 0.64  | 4.27  | <0,01  |
|         | Late apoptosis  | 0   | 0.51  | 0.47  | 10.25 | <0,005 |
|         |                 | κo- | 5.23  | 0.68  |       |        |
|         |                 | λo- | 4.00  | 1.00  | 7.84  | <0,02  |
| RKO     | Early apoptosis | 0   | 0.55  | 0.22  | 80.9  | <0,002 |
|         |                 | κo- | 44.5  | 0.45  |       |        |
|         |                 | λo- | 38.2  | 0.64  | 69.45 |        |
|         | Late apoptosis  | 0   | 0.93  | 0.07  | 25.7  | <0,005 |
|         |                 | κo- | 23.9  | 2.8   |       |        |
|         |                 | λo- | 46.7  | 0.64  | 50,2  | <0,001 |
| RPE-1   | Early apoptosis | 0   | 0.88  | 0.22  | ns    | -      |
|         |                 | κo- | 0.79  | 0.86  |       |        |
|         |                 | λo- | 0.34  | 0.16  |       |        |
|         | Late apoptosis  | 0   | 0.7   | 0.3   | ns    | -      |
|         |                 | κo- | 0.8   | 0.08  |       |        |
|         |                 | λo- | 0.72  | 0.13  |       |        |
| HEK-293 | Early apoptosis | 0   | 0.35  | 0.06  | ns    | -      |
|         |                 | κo- | 0.44  | 0.21  |       |        |
|         |                 | λo- | 0.31  | 0.135 |       |        |
|         | Late apoptosis  | 0   | 0.113 | 0.07  | ns    | -      |
|         |                 | κo- | 0.31  | 0.135 |       |        |
|         |                 | λo- | 0.1   | 0.07  |       |        |

The data set was obtained by the average of three independent experiments for the κo- and λo-compounds.

Supplementary Figure S4. Representative flow cytometry plots of Annexin-FitcV/PI apoptotic assay.

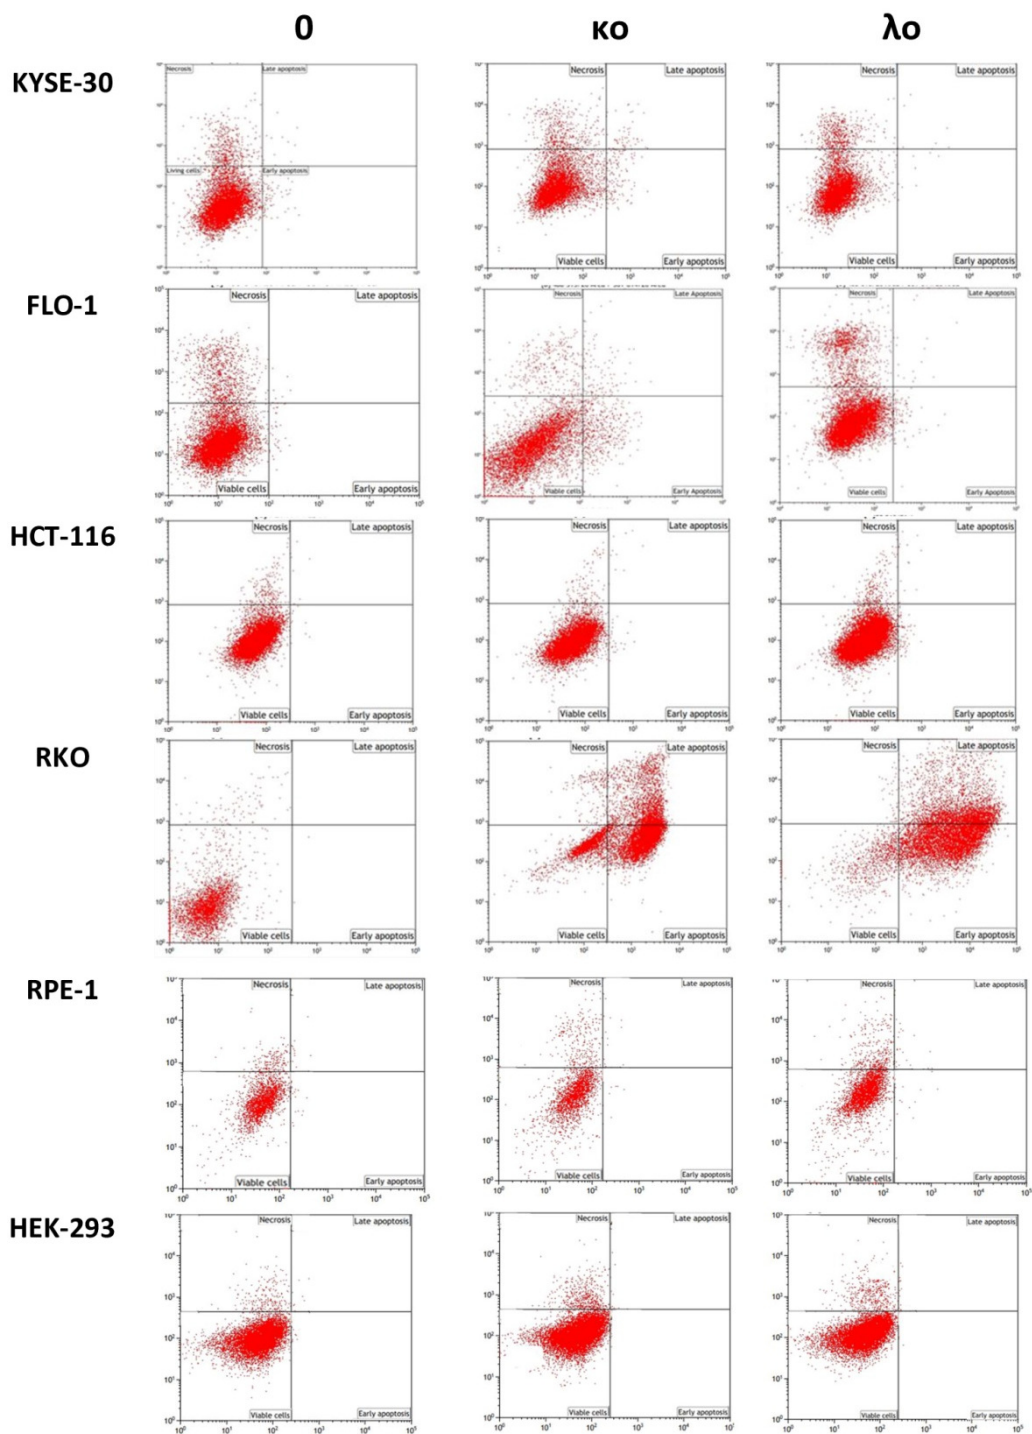

Supplementary Table S4. Statistical analysis of cyclin E, Cdk2, E2F2 proteins in the RKO colon adenocarcinoma cell line and in immortalized cells of the pigmented epithelium RPE-1 in comparison with vehicle (DMEM) treatment. Average percentages, standard deviations ( $\pm$  SD), fold change in comparison to the control and p values of 2-way Anova test with Sidak multiple comparisons (fold change and p-value presented are calculated comparing the sample ( $\kappa$ o- and  $\lambda$ o-) to the untreated cells (DMEM)).

| Cells | Protein                       | Treatment    | quantitative density of protein | ( $\pm$ SD) | Fold decrease | p value |
|-------|-------------------------------|--------------|---------------------------------|-------------|---------------|---------|
| RKO   | Cyclin E                      | 0            | 2202                            | 56.2        | 1.4           | <0,0001 |
|       |                               | $\lambda$ o- | 1563                            | 21.5        |               |         |
|       | Cdk <sub>2</sub>              | 0            | 857                             | 66.3        | 1.37          | <0,0001 |
|       |                               | $\kappa$ o-  | 622                             | 29.6        |               |         |
|       |                               | $\lambda$ o- | 181                             | 9.4         | 4.7           |         |
|       | E <sub>2</sub> F <sub>2</sub> | 0            | 3214                            | 64.2        | 1.64          | <0,0001 |
|       |                               | $\kappa$ o-  | 1955                            | 42.7        |               |         |
|       |                               | $\lambda$ o- | 2554                            | 51.4        | 1.25          |         |
| RPE-1 | Cyclin E                      | 0            | 3403                            | 47,5        | ns            | -       |
|       |                               | $\kappa$ o-  | 3472                            | 38,7        |               |         |
|       |                               | $\lambda$ o- | 3535                            | 40,06       |               |         |
|       | Cdk <sub>2</sub>              | 0            | 857                             | 66          | ns            | -       |
|       |                               | $\kappa$ o-  | 622                             | 29,5        |               |         |
|       |                               | $\lambda$ o- | 181                             | 9,4         |               |         |
|       | E2F2                          | 0            | 2480                            | 172,7       | ns            | -       |
|       |                               | $\kappa$ o-  | 2589                            | 212         |               |         |
|       |                               | $\lambda$ o- | 2707                            | 177         |               |         |

The data set was obtained by the average of three independent experiments for the  $\kappa$ o- and  $\lambda$ o-compounds.

The pCX\_GEMN\_GFP plasmid sequence:

GTCGACATTGATTATTGACTAGTTATTAATAGTAATCAATTACGGGGTCATTAGTTC  
ATAGCCCATATATGGAGTTCCGCGTTACATAACTTACGGTAAATGGCCCGCCTGGCT  
GACCGCCCAACGACCCCCGCCATTGACGTCAATAATGACGTATGTTCCCATAGTAA  
CGCCAATAGGGACTTTCCATTGACGTCAATGGGTGGACTATTTACGGTAAACTGCCC  
ACTTGGCAGTACATCAAGTGTATCATATGCCAAGTACGCCCCCTATTGACGTCAATG  
ACGGTAAATGGCCCGCCTGGCATTATGCCCAGTACATGACCTTATGGGACTTTCCTA  
CTTGGCAGTACATCTACGTATTAGTCATCGCTATTACCATGGGTCGAGGTGAGCCCC  
ACGTTCTGCTTCACTCTCCCCATCTCCCCCCCCCTCCCCACCCCCAATTTTGTATTTATT  
TATTTTTTAATTATTTTGTGACGCGATGGGGGCGGGGGGGGGGGGGGGGCGCGCGCA  
GGCGGGGCGGGGCGGGGCGAGGGGCGGGGCGGGGCGAGGCGGAGAGGTGCGGCG  
GCAGCCAATCAGAGCGGCGCGCTCCGAAAGTTTCCTTTTATGGCGAGGCGGCGGCG  
GCGGCGGCCCTATAAAAAGCGAAGCGCGCGGGCGGGGAGTCGCTGCGTTGCCTT  
CGCCCCGTGCCCCGCTCCGCGCCGCCTCGCGCCGCCCGCCCCGGCTCTGACTGACCG  
CGTTACTCCCACAGGTGAGCGGGCGGGACGGCCCTTCTCCTCCGGGCTGTAATTAGC  
GCTTGGTTTAATGACGGCTCGTTTCTTTTCTGTGGCTGCGTGAAAGCCTTAAAGGGCT  
CCGGGAGGGGCCCTTTGTGCGGGGGGGAGCGGCTCGGGGGGTGCGTGCGTGTGTGTG  
TGCGTGGGGAGCGCCGCGTGCGGCCCGCGCTGCCCGGCGGCTGTGAGCGCTGCGGG  
CGCGGCGCGGGGCTTTGTGCGCTCCGCGTGTGCGCGAGGGGAGCGCGGCCGGGGGC  
GGTGCCCCGCGGTGCGGGGGGGCTGCGAGGGGAACAAAGGCTGCGTGCGGGGTGT  
GTGCGTGGGGGGGTGAGCAGGGGGTGTGGGCGCGGCGGTCGGGCTGTAACCCCCC  
CTGCACCCCCCTCCCCAGTTGCTGAGCACGGCCCCGGCTTCGGGTGCGGGGCTCCGT  
GCGGGGCGTGCGCGGGGGCTCGCCGTGCCGGGCGGGGGGTGGCGGCAGGTGGGGG  
TGCCGGGCGGGGCGGGGCCCGCCTCGGGCCGGGAGGGCTCGGGGGAGGGGCGCGG  
CGGCCCCGAGCGCCGGCGGCTGTCGAGGCGCGGCGAGCCGCAGCCATTGCCTTTT  
ATGGTAATCGTGCGAGAGGGCGCAGGGACTTCCTTTGTCCCAAATCTGGCGGAGCC  
GAAATCTGGGAGGCGCCGCCGACCCCCTCTAGCGGGCGCGGGCGAAGCGGTGCGG  
CGCCGGCAGGAAGGAAATGGGCGGGGAGGGCCTTCGTGCGTCGCCGCGCCGCCGTC  
CCCTTCTCCATCTCCAGCCTCGGGGCTGCCGCAGGGGGACGGCTGCCTTCGGGGGGG  
ACGGGGCAGGGCGGGGTTCGGCTTCTGGCGTGTGACCGGCGGCTCTAGAGCCTCTG  
CTAACCATGTTTCATGCCTTCTTCTTTTCTACAGCTCCTGGGCAACGTGCTGGTTGT  
TGTGCTGTCTCATCATTTTGGCAAAGAATTCGCCACCATGGTGAGCAAGGGCGAGGA  
GCTGTTACCGGGGTGGTGCCCATCCTGGTCGAGCTGGACGGCGACGTAAACGGCC  
ACAAGTTCAGCGTGTCCGGCGAGGGCGAGGGCGATGCCACCTACGGCAAGCTGACC  
CTGAAGTTCATCTGCACCACCGGCAAGCTGCCCGTGCCCTGGCCACCCCTCGTGACC

ACCCTGACCTACGGCGTGCAGTGCTTCAGCCGCTACCCCGACCACATGAAGCAGCA  
CGACTTCTTCAAGTCCGCCATGCCCCGAAGGCTACGTCCAGGAGCGCACCATCTTCTT  
CAAGGACGACGGCAACTACAAGACCCGCGCCGAGGTGAAGTTCGAGGGGCGACACC  
CTGGTGAACCGCATCGAGCTGAAGGGCATCGACTTCAAGGAGGACGGCAACATCCT  
GGGGCACAAGCTGGAGTACAACACAGCCACAACGTCTATATCATGGCCGACA  
AGCAGAAGAACGGCATCAAGGTGAACTTCAAGATCCGCCACAACATCGAGGACGGC  
AGCGTGCAGCTCGCCGACCACTACCAGCAGAACACCCCCATCGGGCGACGGCCCCGT  
GCTGCTGCCCCGACAACCACTACCTGAGCACCCAGTCCGCCCTGAGCAAAGACCCCA  
ACGAGAAGCGCGATCACATGGTCCTGCTGGAGTTCGTGACCGCCGCCGGGATCACT  
CTCGGCATGGACGAGCTGGATCCATCACACTGGCGGGCCGCTCGAGATGAATCCCAG  
TATGAAGCAGAAACAAGAAGAAATCAAAGAGAATATAAAGAATAGTTCTGTCCCAA  
GAAGAACTCTGAAGATGATTCAGCCTTCTGCATCTGGATCTCTTGTTGGAAGAGAAA  
ATGAGCTGTCCGCAGGCTTGTCCAAAAGGAAACATCGGAATGACCACTTAACATCT  
ACAACCTCCAGCCCTGGGGTTATTGTCCCAGAATCTAGTGAAAATAAAAATCTTGGA  
GGAGTCACCCAGGAGTCATTTGATCTTATGATTAAAGAAAATCCATCCTCTCAGTAT  
TGGAAGGAAGTGGCAGAAAAACGGAGAAAGGCGCTGTAAGAATTCACTCCTCAGGT  
GCAGGCTGCCTATCAGAAGGTGGTGGCTGGTGTGGCCAATGCCCTGGCTCACAAAT  
ACCACTGAGATCTTTTTCCCTCTGCCAAAAATTATGGGGACATCATGAAGCCCCTTG  
AGCATCTGACTTCTGGCTAATAAAGGAAATTTATTTTCATTGCAATAGTGTGTTGGA  
ATTTTTTGTGTCTCTCACTCGGAAGGACATATGGGAGGGCAAATCATTTAAACATC  
AGAATGAGTATTTGGTTTAGAGTTTGGCAACATATGCCATATGCTGGCTGCCATGAA  
CAAAGGTGGCTATAAAGAGGTCATCAGTATATGAAACAGCCCCCTGCTGTCCATTCC  
TTATTCCATAGAAAAGCCTTGACTTGAGGTTAGATTTTTTTTTATATTTTGTTTTGTGTT  
ATTTTTTTCTTTAACATCCCTAAAATTTTCCTTACATGTTTTACTAGCCAGATTTTTCC  
TCCTCTCCTGACTACTCCAGTCATAGCTGTCCCTCTTCTCTTATGAAGATCCCTCGA  
CCTGCAGCCCAAGCTTGGCGTAATCATGGTCATAGCTGTTTCCTGTGTGAAATTGTT  
ATCCGCTCACAATTCCACACAACATACGAGCCGGAAGCATAAAGTGTAAGCCTGG  
GGTGCCTAATGAGTGAGCTAACTCACATTAATTGCGTTGCGCTCACTGCCCCGCTTTC  
CAGTCGGGAAACCTGTCGTGCCAGCGGATCCGCATCTCAATTAGTCAGCAACCATA  
GTCCCGCCCCCTAACTCCGCCCATCCCGCCCCCTAACTCCGCCCAGTTCGCCCCATTCTC  
CGCCCCATGGCTGACTAATTTTTTTTTATTTATGCAGAGGCCGAGGCCGCCTCGGCCT  
CTGAGCTATTCCAGAAGTAGTGAGGAGGCTTTTTTGGAGGCCTAGGCTTTTGCAAAA  
AGCTAACTTGTTTATTGCAGCTTATAATGGTTACAAATAAAGCAATAGCATCACAAA  
TTTCACAAATAAAGCATTTTTTTTCACTGCATTCTAGTTGTGGTTTGTCCAAACTCATC  
AATGTATCTTATCATGTCTGGATCCGCTGCATTAATGAATCGGCCAACGCGCGGGGA



GAGGCGGTTTGC GTATTGGGCGCTCTTCCGCTTCCTCGCTCACTGACTCGCTGCGCTC  
GGTCGTTTCGGCTGCGGCGAGCGGTATCAGCTCACTCAAAGGCGGTAATACGGTTATC  
CACAGAATCAGGGGATAACGCAGGAAAGAACATGTGAGCAAAAGGCCAGCAAAAG  
GCCAGGAACCGTAAAAAGGCCGCGTTGCTGGCGTTTTTCCATAGGCTCCGCCCCCT  
GACGAGCATCACAAAAATCGACGCTCAAGTCAGAGGTGGCGAAACCCGACAGGACT  
ATAAAGATAACCAGGCGTTTCCCCCTGGAAGCTCCCTCGTGCGCTCTCCTGTTCCGAC  
CCTGCCGCTTACCGGATACCTGTCCGCCTTTCTCCCTTCGGGAAGCGTGGCGCTTTCT  
CAATGCTCACGCTGTAGGTATCTCAGTTCGGTGTAGGTCGTTTCGCTCCAAGCTGGGC  
TGTGTGCACGAACCCCCCGTTCAGCCCGACCGCTGCGCCTTATCCGGTAACTATCGT  
CTTGAGTCCAACCCGGTAAGACACGACTTATCGCCACTGGCAGCAGCCACTGGTAA  
CAGGATTAGCAGAGCGAGGTATGTAGGCGGTGCTACAGAGTTCTTGAAGTGGTGGC  
CTAACTACGGCTACACTAGAAGGACAGTATTTGGTATCTGCGCTCTGCTGAAGCCAG  
TTACCTTCGGAAAAAGAGTTGGTAGCTCTTGATCCGGCAAACAAACCACCGCTGGTA  
GCGGTGGTTTTTTTTGTTTGCAAGCAGCAGATTACGCGCAGAAAAAAAGGATCTCAA  
GAAGATCCTTTGATCTTTTCTACGGGGTCTGACGCTCAGTGGAACGAAAACCTCACGT  
TAAGGGATTTTGGTCATGAGATTATCAAAAAGGATCTTCACCTAGATCCTTTTAAAT  
TAAAAATGAAGTTTTAAATCAATCTAAAGTATATATGAGTAACTTGGTCTGACAGT  
TACCAATGCTTAATCAGTGAGGCACCTATCTCAGCGATCTGTCTATTTTCGTTTCATCCA  
TAGTTGCCTGACTCCCCGTCGTGTAGATAACTACGATACGGGAGGGCTTACCATCTG  
GCCCCAGTGCTGCAATGATACCGCGAGACCCACGCTCACCGGCTCCAGATTTATCAG  
CAATAAACCCAGCCAGCCGGAAGGGCCGAGCGCAGAAGTGGTCCTGCAACTTTATCC  
GCCTCCATCCAGTCTATTAATTGTTGCCGGAAGCTAGAGTAAGTAGTTTCGCCAGTT  
AATAGTTTTCGCAACGTTGTTGCCATTGCTACAGGCATCGTGGTGTACGCTCGTCG  
TTTGGTATGGCTTCATTCAGCTCCGGTTCCCAACGATCAAGGCGAGTTACATGATCC  
CCCATGTTGTGCAAAAAAGCGGTTAGCTCCTTCGGTCCTCCGATCGTTGTCAGAAGT  
AAGTTGGCCGAGTGTTATCACTCATGGTTATGGCAGCACTGCATAATTCTCTTACT  
GTCATGCCATCCGTAAGATGCTTTTCTGTGACTGGTGAGTACTCAACCAAGTCATTC  
TGAGAATAGTGTATGCGGCGACCGAGTTGCTCTTGCCCGGCGTCAATACGGGATAAT  
ACCGCGCCACATAGCAGAACTTTAAAAGTGCTCATCATTGGAACGTTCTTCGGGG  
CGAAAACCTCTCAAGGATCTTACCGCTGTTGAGATCCAGTTTCGATGTAACCCACTCGT  
GCACCCAACTGATCTTCAGCATCTTTTACTTTTACCAGCGTTTCTGGGTGAGCAAAA  
ACAGGAAGGCAAAATGCCGCAAAAAAGGGAATAAGGGCGACACGGAAATGTTGAA  
TACTCATACTCTTCCTTTTTCAATATTATTGAAGCATTTATCAGGGTTATTGTCTCAT  
GAGCGGATACATATTTGAATGTATTTAGAAAAATAAACAAATAGGGGTTCGCGCA  
CATTTCCCCGAAAAGTGCCACCTG
